# Supplementary material
Source: PubMed Central journal article supplement (PMC3771639)
Supplement: NIHMS508076-supplement-Supp_Figure_S1-S5___Table_S1-S5.pdf [file NIHMS508076-supplement-Supp_Figure_S1-S5___Table_S1-S5.pdf]

Product feedback regulation implicated in translational control of the *Trypanosoma brucei* S-adenosylmethionine decarboxylase regulatory subunit prozyme

Yanjing Xiao, Suong Nguyen, Sok Ho Kim, Oleg A. Volkov, Benjamin P. Tu and Margaret A. Phillips

Department of Pharmacology, University of Texas Southwestern Medical Center at Dallas, 6001 Forest Park Rd, Dallas, Texas 75390-9041

Email : [margaret.phillips@UTSouthwestern.edu](mailto:margaret.phillips@UTSouthwestern.edu); Tel: (214) 645-6164

**Supplementary Material  
Figures.**

**Figure S1. Cloned Prozyme mRNA 3'UTR RACE products.** Primers used to generate PCR fragments from cDNA are displayed in Table S1. All clones were sequenced in their entirety in both directions. The sequence is number from the first gene specific base after the spliced leader sequence in the 5'UTR.

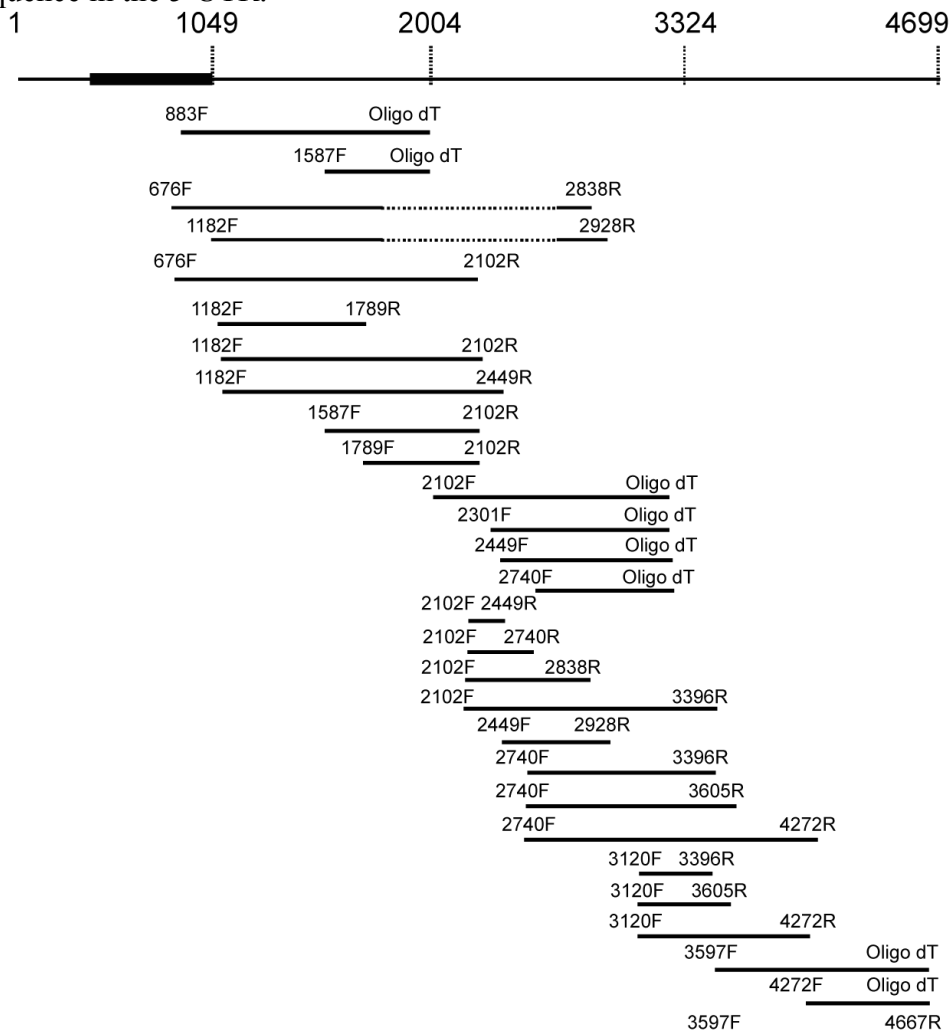



**TATATATAACGTAATATTAATAATAATAATAATAGAGAGCTGCCGTAATGGTGTATGTGTCTTGTGGGTGCGCGG**  
**G****CAGGGAGGGGTG**AAAAAGTTGTGTGGTTACCCGCTATTGAGGATAGTAGATGGACGGCGGGCAGTTCCTATC  
 AGGCATTAAGAGAACAGGCTAATGAACAGCTGGGAAAGAAAACCAATCGAGAAGCGGCGTGTACGTGAAGT  
**GGCTTACCTTCGTTCAAATTAGTGGTGTCTC**ATCCCTTCATTTTCGTTCTTTCTTTTTTCTCCCGTATCATT  
 TCACTATTTTTTCCAACCTTGTTCGCTTTCATGGTTCACCACCAGCACCTCTTGGTAATGCCTATTTTTCTTT  
 TTCTTTTTTTGTCCAGCTGTACAGCTGGTTTTAAACTATTTCGATGGACAACGGCACAGGAATGACGGAACAGTAA  
 CGGAAACAAAGATGTGAGTATTTGTGGGTGGGAGCTTGAAAATGAATACGCGCGCGTCCGTACGTTTGTATTTGC  
 GATTTGAAAGGTGGATAGAGCCGCTAATTTACGTTACTGAGCGAAAGCCTTAACAGACTTTTCAGCAGCGGGGTTT  
 TTGTTGCATACAACTTATTTATC**AAAAAGAAAAAAAAAGAAAGAA**CCATTTGTGCGCCGTTACGTATTGCTTTTCC  
 TGCCCCCTCGCCCTTCTTGTTCACCTTCTACTTCCCTTCCCTTACCATCACTGGGGGCGGAAGATCATATGGTTATAT  
 ACCAAGCAGCGGTGGTATTGAAAGGAAGTAGCTGAAGTTATGTGCATCCGACAGGAAGCGAGGTGACGGTTAAAGA  
 GAAACGCAACAGGCGACACAAGCACAAGTCAAGAGAAGTTGAAACAACAGAAGCGAAAGAGGTGATTAGACCTT  
 CAAGCAGGTATAAGGAAGAGGATCAAGAGTAATATGAAAGAAAAAGAATGAAATGAAGTGTAGAGTTGATGAATT  
 ATCGAATAATAGTAACAAAATATCTACGACTTTCTCCCTCTGCTTTTCGTGTGTGGCTGGAGAAATGCTGCATTAA  
 CATGTGTTATGAGGTATAGCACTGGAAGGAAAAGAATCAAGTAGCGTTTTAGAAGAAGAGAAATGATGCCGATCG  
 GAAGGGAGAAGGTGATACGATGTCGGAGGGGTGACGCTGCCAAATACATGTACCTGAGTCTGTGTGTTTTAAGGA  
 TAGATATGCGTAACATACGAGTCTGGAAACCAGAGGCTGATGGTGTATGTGAGGGGTGATTGAGACGTATGAGAAT  
 GAGCATTTGAGGTTACTTTTACTTGCCTGTGATTTACGGTAACTGATTGAGAGTAAATGTGACCTCCATACATGA  
 TTTTGAAGTTTACACTTTTGTGGTCAATAAGGTGGGAGGTCACATGTTTCGTTTATTTATCCTTTTTTCTTTTCGTT  
 GAGAGCGCATGATAATGTGAGGAACACCAGCATGTTTCTGCTCCTCTCAGTTTTGTGATGTTGCTGTTGTTGCC  
 ATATTTCAATTTCTCCAAGCGAACAAGTTGCTCACGCCTTTGCCTTTGCCTTTGTCAGTTTTGTTTTTCATATGTTT  
 TCAGTTTATCTTACCCACTTTCCAGGTATTTGCGTATGGCGGGAGCCCATGACTGTGGGTCAATTTGTTTCTTCCA  
 TCTTTCCACATTTCTGCATGTTGTTTCAACGCCAACATTCTGATTCTATTTGAAAGGGATAGAAGAGGAGAAAAG  
 AAGGGAGAGTGAAGGATAATAGTCAGCTGAGGTGACGGGAGAGGAAGACATATTTGTATACATACCTACACATAT  
 CAATATATATGTGTATATGTATACGTTCCCTCCCAAATTAGTATCACCTGGGGTTTTCTCCTGTGTGACGAGGTCT  
 AACTCAAAAGGGTTAAAGGAAGACGCAAAAGAGATTAATTTCTTGGCTTCATTTTTGGTTGAGCTTCACAACCT  
 CCGTGTGCCGAGTTTCCATAAATGCCTTTTTGTGCGAC**TCGCACTTGTGA** - 4699

**Figure S2B. Downstream gene and 3' splice site for the 4699 kb prozyme mRNA.** Data were taken from tritrypdb.org/. The downstream gene is AdoMetDC (Tb927.6.4460) and the sequence in blue represents the end of the prozyme 3'UTR from the 4.7kb mRNA as mapped by RACE (the polyadenylation site) and yellow represents the start of the 5'UTR of the downstream AdoMetDC gene. The AG splice site is in bold, the upstream poly(Y) track is underlined and in bold and the ATG start site of the AdoMetDC gene is in italics and underlined.

GCTTCAACCTCCGTGTGTCAAGTTTCCATAAATGCCTTTTTGTGCGAC**TCGCACTTGTGA**TGTAGGCACCACTAATA  
 CCTG**CCCTTTCCCTTCTCTTTCTTTCTTTCTCCCT**ATTCTATCTTATTCATATTTTATTTCCCTCGTTTCGGATTT  
 TTGACCTTTTTCTGTGG**AGTTTGTACGCGTATC**CTCGAGCACAAAAGTACATTGTTTGTGAGCTTGCCTCTTAGG  
 AAGCGCACCAATTCCTTTGTGGGCCTGCGTGTGTGCGTGTCTGGTTTGGTTATTTAATCCGTAAGGTGCTATATTTGAC  
 CGCACACTGACTGAAGTACTAGTCA**ATGT**CCTCTTGAAGGACTCTTTTCGCTCATGGCGATGTGGGGTTCCATCGCT  
 CGTTTTGACCCAAAGCACGAGCGAAGCTTCG

**Figure S3. RNase protection assay (RPA) of RNA isolated from BSF *T. brucei*.** **A.** RPA probe spanning 94 bases of sequence 5' to the region of secondary structure in the prozyme cDNA and 114 bases downstream of the 3' region of secondary structure. A 41-base tag was included on the 5' end to prime T7 polymerase. **B.** RPA of total RNA extracted from BSF 427 cells and from BSF 90-13 cells transiently transfected with construct 4a or 4b to serve as controls. Arrows indicate bands at the expected sizes of either the fully protected probe (208 nt) or of the two fragments (114 and 94 nt). *Msp*I digested pBR322 DNA (New England Biolabs) was used as markers (M).

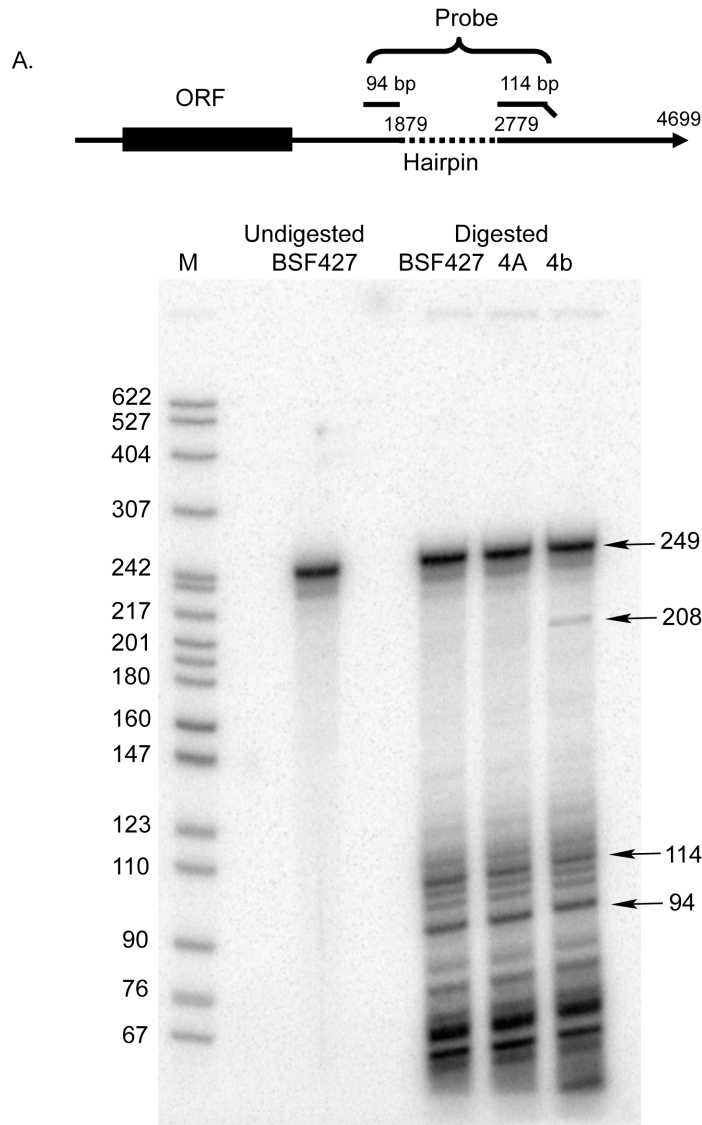

**Figure S4. LC-MS/MS analysis of polyamine and AdoMet pools after knockdown or chemical inhibition of AdoMetDC.** **A.** The effects of chemical inhibition of AdoMetDC and/or ODC on the intracellular AdoMet and methylthioadenosine (MTA) pools. BF427 cells were treated with MDL 73811 (75 nM) (M) and/or DMFO (12.5  $\mu$ M) (D) for either 1 (d1) or 3 (d3) days before harvesting (n = 1). After acid extraction from cell lysates, intracellular AdoMet and MTA levels were analyzed by LC-MS/MS. Data complements that shown in Figure 3C. **B.** The effect of knockdown of AdoMetDC by RNAi on polyamine and AdoMet pools. RNAi (*T. brucei* AdoMetDC RNAi cell line) and RNAi-C (*T. brucei* AdoMetDC RNAi cell line complemented with human AdoMetDC) cells lysates were analyzed by LC/MS three days post Tet induction. Data were collected for MDL 73811 in parallel and are shown. Errors represent the standard error of the mean for n=3 independent biological replicates. For each compound two separate daughter ions (represented by the red and blue bars) were followed by MS to provide additional conformation of the data. For dcAdoMet a relative peak area of  $1 \times 10^{-6}$  for the more abundant ion represents the lower limit of quantitation. Daughter ion pairs were as follows: AdoMet (ion 1, 355/250; ion 2, 399/136), dcAdoMet (ion 1, 355/250; ion 2, 355, 136), MTA (ion 1, 298/136; ion 2, 298/119), putrescine (ion 1, 89/72; ion 2, 89/71) and spermidine (ion 1, 146/72; ion 2, 146/84).

A.

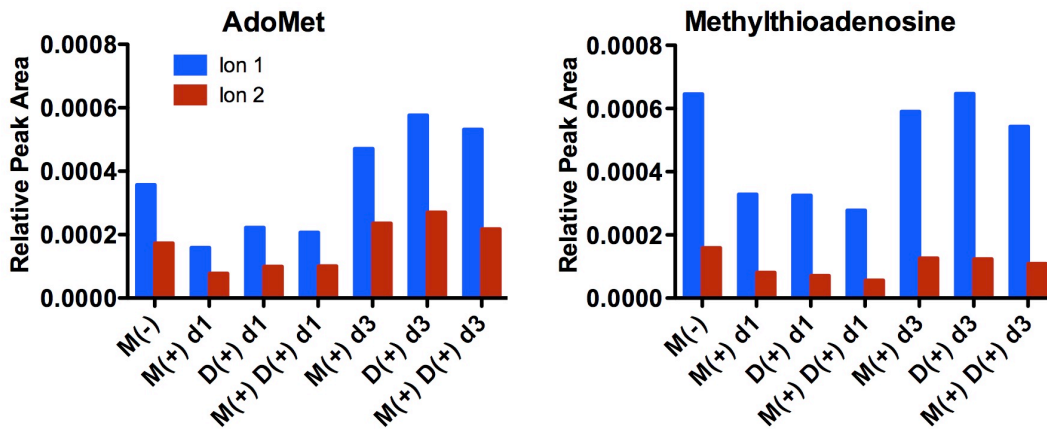

B.

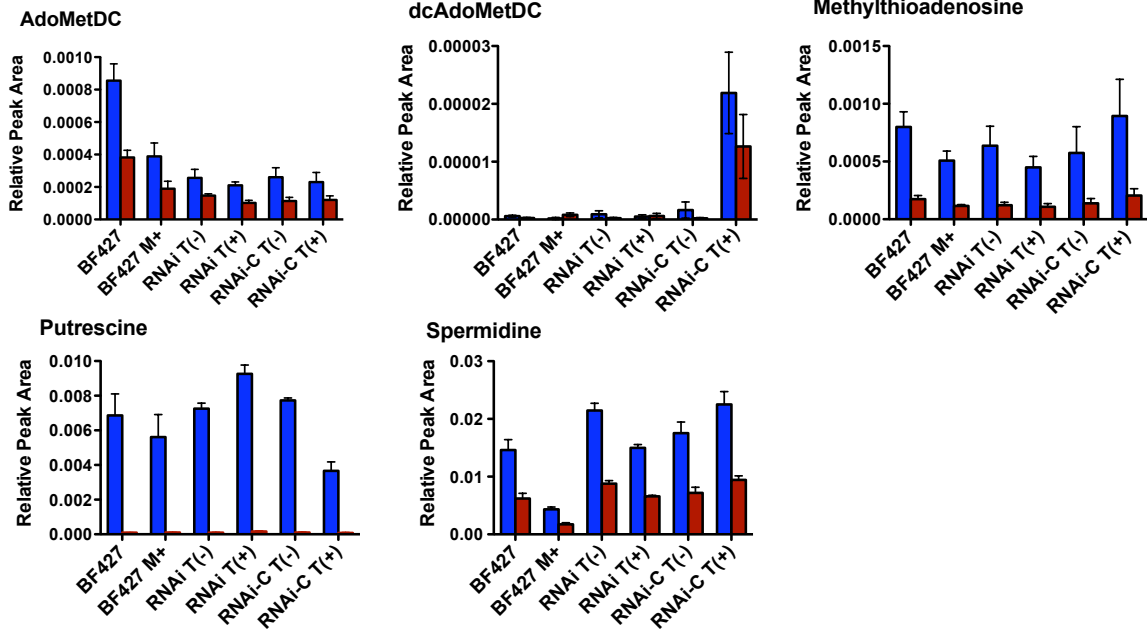

**Figure S5. Exogenous dcAdoMet does not rescue the cell growth arrest caused by AdoMetDC inhibition or depletion by RNAi.** A. BSF *T. brucei* 427 cells were treated with MDL 73811 (225 nM) with and without the addition of exogenous dcAdoMet (50  $\mu$ M). B. *T. brucei* AdoMetDC RNAi cells were treated with and without Tet (1  $\mu$ g/ml) to induce AdoMetDC RNAi both in the absence and presence of exogenous dcAdoMet (50  $\mu$ M). Similarly dcAdoMet was unable to rescue the growth defect caused by treatment with 75 nM MDL 73811 (data not shown).

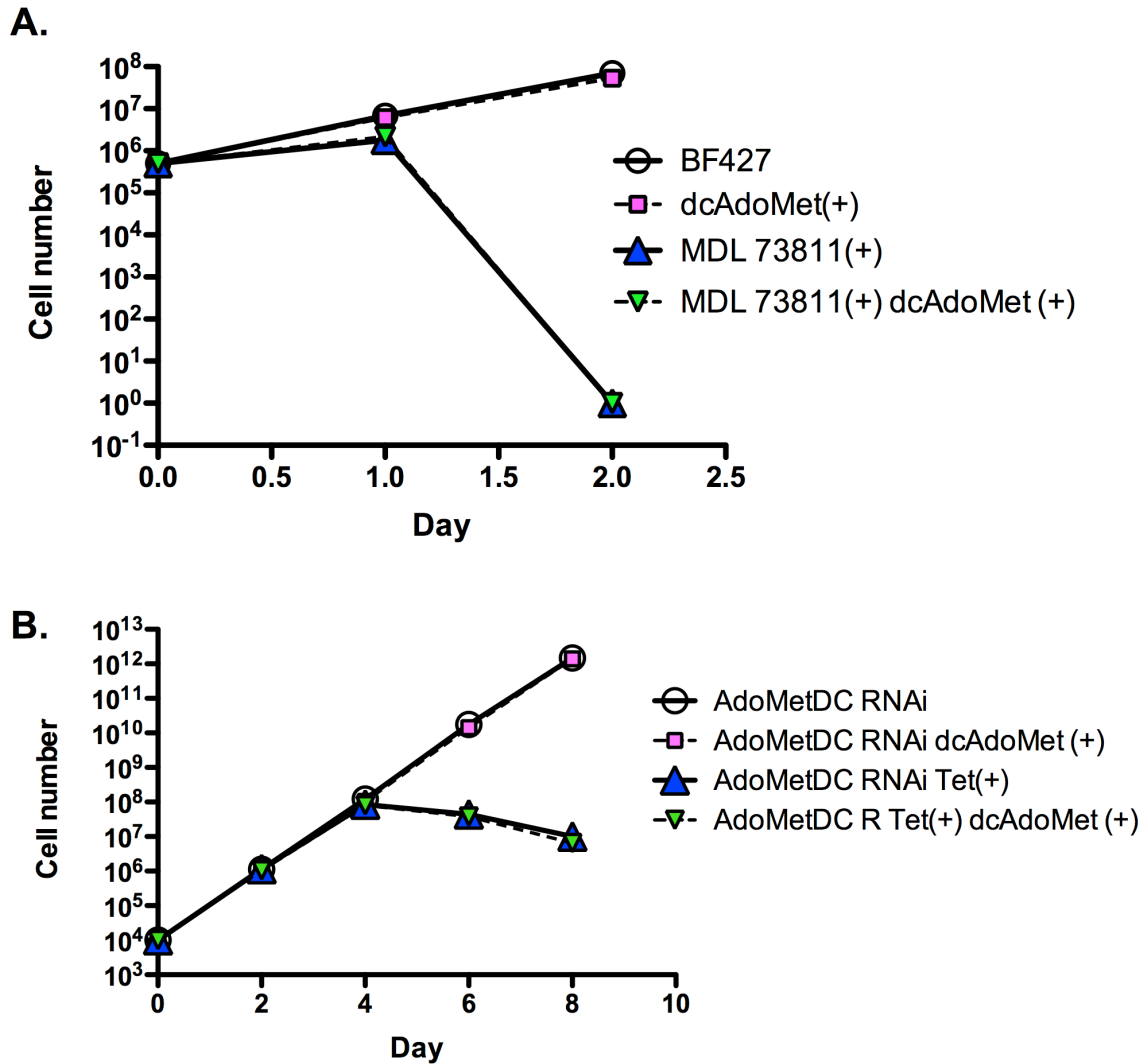

Table S1. PCR and sequencing primers (mismatches between our sequence (Figure 2) and the sequence in the TriTrypDB used to generate primers are shaded in yellow)

| Primer name     | Sequence                                                |
|-----------------|---------------------------------------------------------|
| Forward Primers |                                                         |
| 676F            | 5'- GTA CAA CGT ACA AGC AGA TGA TGA GTA TG -3'          |
| 883F            | 5'- CCC GGA GAG AGT TCT GCT CGT GCT GCT GCA GGA C -3'   |
| 1182F           | 5'- ATA TGG ATA CTC TCC CCC TAA TTT TTA CAG -3'         |
| 1587F           | 5'- CCA TAG CAG CCG TCA AGA GGC ACA CAT TTT CC -3'      |
| 1789F           | 5'- GCT TGC GCC TGA TGC AGT GGT TCT GTT CAT CAA C -3'   |
| 2102F           | 5'- CGA ACC TTG TTC AAT ACA TTA GGT AAT AAA CGC GGG -3' |
| 2301F           | 5'- GGA GCG TGA TTT GGT TTG CAC GAA AGT GG -3'          |
| 2449F           | 5'- GCT GGA AGT GAA AGG TGC TGC CTA ATA GT -3'          |
| 2740F           | 5'- CTG CCG TAA TGG TGT ATG TGT CTT GTG GGT -3'         |
| 3120F           | 5'- GGA CAA CGG CAC AGG AAT GAC GGA ACA GTA ACG -3'     |
| 3597F           | 5'- CCT TCA AGC AGG TAT AAG GAA GAG GAT CAA GAG TA -3'  |
| 4272F           | 5'- GTT CTC AGT TTA TCT TAC CCA CTT TCC AGG -3'         |
| Reverse Primers |                                                         |
| 1789R           | 5'- GTT GAT GAA CAG AAC CAC TGC ATC AGG CGC AAG C -3'   |
| 2102R           | 5'- CCC GCG TTT ATT ACC TAA TGT ATT GAA CAA GGT TCG -3' |
| 2449R           | 5'- ACT ATT AGG CAG CAC CTT TCA CTT CCA GC -3'          |
| 2740R           | 5'- ACC CAC AAG ACA CAT ACA CCA TTA CGG CAG -3'         |
| 2838R           | 5'- CTC TTT TAA TGC CTG ATA GGA ACT GCC -3'             |
| 2928R           | 5'- GAG ACA CCA CTA ATT TGA ACG AAG GTA AG -3'          |
| 3396R           | 5'- GAT GGT AAG GAA AGG AAG TAG AAG TG -3'              |
| 3605R           | 5'- TAC TCT TGA TCC TCT TCC TTA TAC CTG -3'             |
| 4272R           | 5'- GGA AAG TGG GTA AGA TAA ACT GAG AAC -3'             |
| 4667R           | 5'- TCA CAA GTG CGA GTC GAC AAA AAG GCA TTT ATG -3'     |



Table 2S. Cloning primers for CAT reporter constructs (sequences underlined are restriction enzyme sites, mismatches between Figure 2 and the TriTrypDB sequence are shaded in yellow)

| Sequence     |                                                                               |
|--------------|-------------------------------------------------------------------------------|
| Fragment 1   | Forward 5'- ATC AGC <u>GGA TCC</u> TTT CCA GTA CAG ATG CTG AAA C-3'           |
|              | Reverse 5'- CAA AGT <u>ACG CGT</u> GAG GGA GGG GTG AAT GCC CCC C-3'           |
| Fragment 2   | Forward 5'- ATA AGA <u>GGA TCC</u> CTG TAG CCA ACG CCC ACG GAC -3'            |
|              | Reverse 5'- CAA ATT <u>ACG CGT</u> TGC CCG CGC ACC CAC AAG ACA CAT-3'         |
| Fragment 3   | Forward 5'- ATC AGC <u>GGA TCC</u> TTT CCA GTA CAG ATG CTG AAA C-3'           |
|              | Reverse 5'- CAA ATT <u>ACG CGT</u> TGC CCG CGC ACC CAC AAG ACA CAT-3'         |
| Fragment 5   | Forward 5'- ATC AGC <u>GGA TCC</u> TTT CCA GTA CAG ATG CTG AAA C-3'           |
|              | Reverse 5'- GAT CGT <u>ACG CGT</u> CTC CTT TAT <u>AAG</u> ACG AAA AAG AGG -3' |
| Fragment 6BM | Forward 5'- AAT ATT <u>GGA TCC</u> CGC GGG CAG GGA GGG GTG AAA AAG -3'        |
|              | Reverse 5'- CGC AGT <u>ACG CGT</u> TCA CAA GTG CGA GTC GAC AAA AAG GCA        |
|              | TTT ATG -3'                                                                   |
| Fragment 6MS | Forward 5'- CAA GTG <u>ACG CGT</u> CGC GGG CAG GGA GGG GTG AAA AAG -3'        |
|              | Reverse 5'- CGC AGG <u>GTC GAC</u> TCA CAA GTG CGA GTC GAC AAA AAG GCA        |
|              | TTT ATG -3'                                                                   |
| Fragment 8   | Forward 5'- CAA TCT <u>GGA TCC</u> TGG AGA AAT GCT GCA TTA AC -3'             |
|              | Reverse 5'- CGC AGT <u>ACG CGT</u> TCA CAA GTG CGA GTC GAC AAA AAG GCA        |
|              | TTT ATG -3'                                                                   |
| Fragment 9BM | Forward 5'- AAT ATT <u>GGA TCC</u> CGC GGG CAG GGA GGG GTG AAA AAG -3'        |
|              | Reverse 5'- CGC AGT <u>ACG CGT</u> GAT AAA TAA GTT TG <u>C</u> ATG CAA C -3'  |
| Fragment 9MS | Forward 5'- CAA GTG <u>ACG CGT</u> CGC GGG CAG GGA GGG GTG AAA AAG -3'        |
|              | Reverse 5'- CGC AGG <u>GTC GAC</u> GAT AAA TAA GTT TG <u>C</u> ATG CAA C -3'  |

Table 3S. Primers employed for PCR, real time PCR, and synthesis of RNA probes for northern blot analysis and RNase protection assay. Sequences in blue represent the T7 promoter, the underlined sequence in the RPA probe represents added random sequence to extend the probe length, and mismatches between Figure 2 and the TriTrypDB sequence are shaded in yellow.

| Sequence       |                                                                                                                                                                                                                                                                       |
|----------------|-----------------------------------------------------------------------------------------------------------------------------------------------------------------------------------------------------------------------------------------------------------------------|
| Primer set 1   | Forward 5'- GTA CAA CGT ACA AGC AGA TGA TGA GTA TG -3'                                                                                                                                                                                                                |
|                | Reverse 5'- CTC TTT TAA TGC CTG ATA GGA ACT GCC -3'                                                                                                                                                                                                                   |
| Primer set 2   | Forward 5'- ATA TGG ATA CTC TCC CCC TAA TTT <u>C</u> TA CAG -3'                                                                                                                                                                                                       |
|                | Reverse 5'- GAG ACA CCA CTA ATT TGA ACG AAG GTA AG -3'                                                                                                                                                                                                                |
| Probe 1        | Forward 5'- TCT TTC ATG CGG GTC AAC TAC GGC TCG -3'                                                                                                                                                                                                                   |
|                | Reverse 5'- <u>TAA TAC GAC TCA CTA TAG</u> GGG TGA AAC CTT CCA ATC TAT C-3'                                                                                                                                                                                           |
| Probe 2        | Forward 5'- GGA CAG GAA GAA GGC ACT GGT ACT TCA GAC GTC TC-3'                                                                                                                                                                                                         |
|                | Reverse 5'- <u>TAA TAC GAC TCA CTA TAG</u> GGA CAC CAT TAC GGC AGC TCT <u>T</u> -3'                                                                                                                                                                                   |
| Human AdoMetDC | Forward 5'- GGC ATA TGG AAG CTG CAC ATT TTT TCG AAG G-3'                                                                                                                                                                                                              |
|                | Reverse 5'- GGG GAT CCT CAA CTC TGC TGT TGT TGC TGC TTC-3'                                                                                                                                                                                                            |
| CAT            | Forward 5'- CAT TTT GAG GCA TTT CAG TCA G -3'                                                                                                                                                                                                                         |
|                | Reverse 5'- TAA AGG CCG GAT AAA ACT TGT G -3'                                                                                                                                                                                                                         |
| TERT           | Forward 5'- GAG CGT GTG ACT TCC GAA GG -3'                                                                                                                                                                                                                            |
|                | Reverse 5'- AGG AAC TGT CAC GGA GTT TGC -3'                                                                                                                                                                                                                           |
| RPA probe      | 5'- <u>TAATACGACTCACTATAGGG</u> CTCTGCTCTTCTCGCACCGCATTCTTTCCAGCTGT TCATTAGCCTGTTCTCTTTTAATGCCTGATAGGAAGTCCCGCCGCGTCCATCTACTATCCTCAATAGCGGGTAA CCACACAACCTTTTTACCCCTCCCGAGGGAGGGGTGAATGCCCCCGAAAAGGTTTTACCACAACCAATATTC GCTTTTGTGATGAACAGAACCCTGCATCAGGCGCAAGCTGG -3' |

Table 4S. 3'UTR CAT reporter constructs

|                                                             | Start        | End          |
|-------------------------------------------------------------|--------------|--------------|
| Construct 1                                                 | 1049         | 1879         |
| Construct 2                                                 | 1880         | 2778         |
| Construct 3                                                 | 1049         | 2778         |
| Construct 4a                                                | 1049         | 3324         |
| Construct 4b<br>(minus region<br>of secondary<br>structure) | 1049<br>2779 | 1879<br>3324 |
| Construct 5                                                 | 1049         | 2555         |
| Construct 6                                                 | 2779         | 4699         |
| Construct 7                                                 | 1049         | 4699         |
| Construct 8                                                 | 3731         | 4699         |
| Construct 9                                                 | 2779         | 3324         |
| Construct 10                                                | 1049         | 2004         |

Table 5S. Summary table of CAT enzyme activity and mRNA level in cells transfected with prozyme mRNA 3'UTR reporter constructs. Data shown are averages and the standard deviation of the mean for n=3-4 independent biological replicates and represent the fold change when cells were culture with MDL 73811 (M) versus without the compound (M+/M-). The average data are plotted in Figure 2.

|                  | Protein<br>Fold change | mRNA<br>Fold change |
|------------------|------------------------|---------------------|
| Negative control | 1.2 ± 0.22             | 1.0 ± 0.14          |
| Fragment 1       | 1.4 ± 0.30             | 1.3 ± 0.59          |
| Fragment 2       | 0.42 ± 0.02            | 1.0 ± 0.26          |
| Fragment 3       | 7.9 ± 1.79             | 1.3 ± 0.35          |
| Fragment 4a      | 7.7 ± 4.5              | 1.1 ± 0.21          |
| Fragment 4b      | 4.8 ± 1.3              | 1.1 ± 0.23          |
| Fragment 5       | 3.4 ± 1.4              | 1.8 ± 0.95          |
| Fragment 6       | 4.0 ± 2.8              | 0.91 ± 0.16         |
| Fragment 7       | 2.5 ± 1.3              | 1.4 ± 0.50          |
| Fragment 8       | 1.2 ± 0.84             | 1.3 ± 0.64          |
| Fragment 9       | 1.5 ± 0.33             | 0.79 ± 0.17         |
| Fragment 10      | 1.1 ± 0.22             | 0.91 ± 0.13         |
